# Supplementary material for: A colorimetric and ratiometric fluorescent probe for ClO−targeting in mitochondria and its application in vivo
Source: Royal Society of Chemistry journal article supplement (doi:10.1039/c4tb02003k), 2015-01-01
Supplement: c4tb02003k1.pdf [file c4tb02003k1.pdf]

# Supporting information

## A colorimetric and ratiometric fluorescent probe for ClO<sup>-</sup> targeting on mitochondria and the application in *vivo*

Hongde Xiao<sup>a</sup>, Jianhui Li<sup>b</sup>, Jin Zhao<sup>a</sup>, Gui Yin<sup>a,c\*</sup>, Yiwu Quan<sup>a</sup>, Jie Wang<sup>a</sup> and  
Ruiyong Wang<sup>b\*</sup>

|                                             |   |
|---------------------------------------------|---|
| <b>Fig. S1</b> .....                        | 3 |
| <b>Fig. S2</b> .....                        | 3 |
| <b>Fig. S3</b> .....                        | 4 |
| <b>Fig. S4</b> .....                        | 4 |
| ESI-MS of compound 2 .....                  | 5 |
| <sup>1</sup> H NMR of the compound 2 .....  | 5 |
| <sup>13</sup> C NMR of the compound 2 ..... | 6 |
| ESI-MS of compound 3 .....                  | 6 |
| <sup>1</sup> H NMR of the compound 3 .....  | 7 |
| <sup>13</sup> C NMR of the compound 3 ..... | 7 |
| HR-MS of the probe PMN-TPP .....            | 8 |
| <sup>1</sup> H NMR of the probe .....       | 8 |
| <sup>13</sup> C NMR of the probe .....      | 9 |

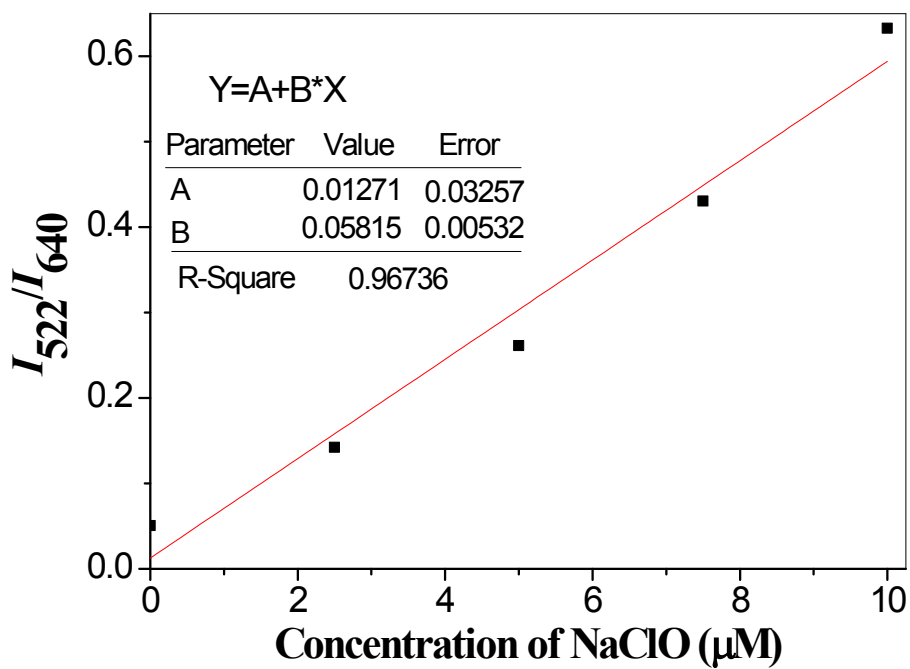

Fig. S1 The linear fitting of  $I_{522\text{nm}}/I_{640\text{nm}}$  with the concentration of  $\text{ClO}^-$

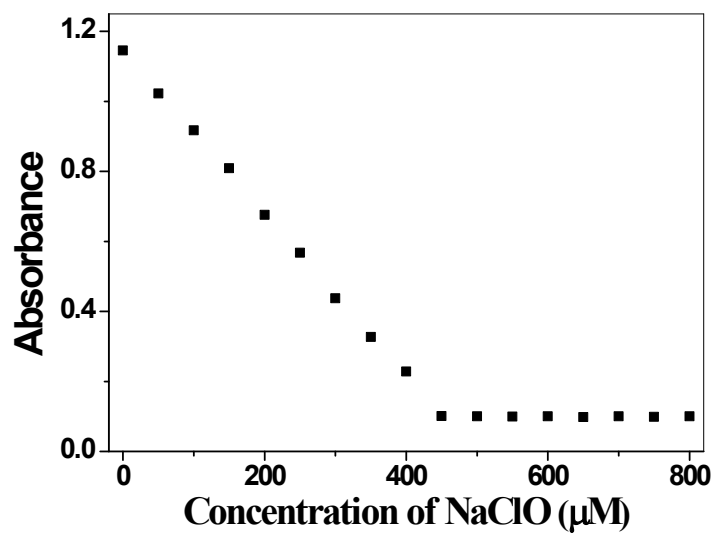

Fig. S2 Absorption intensities of the probe PMN-TPP (100  $\mu\text{M}$ ) upon addition of  $\text{ClO}^-$  (0-800  $\mu\text{M}$ )

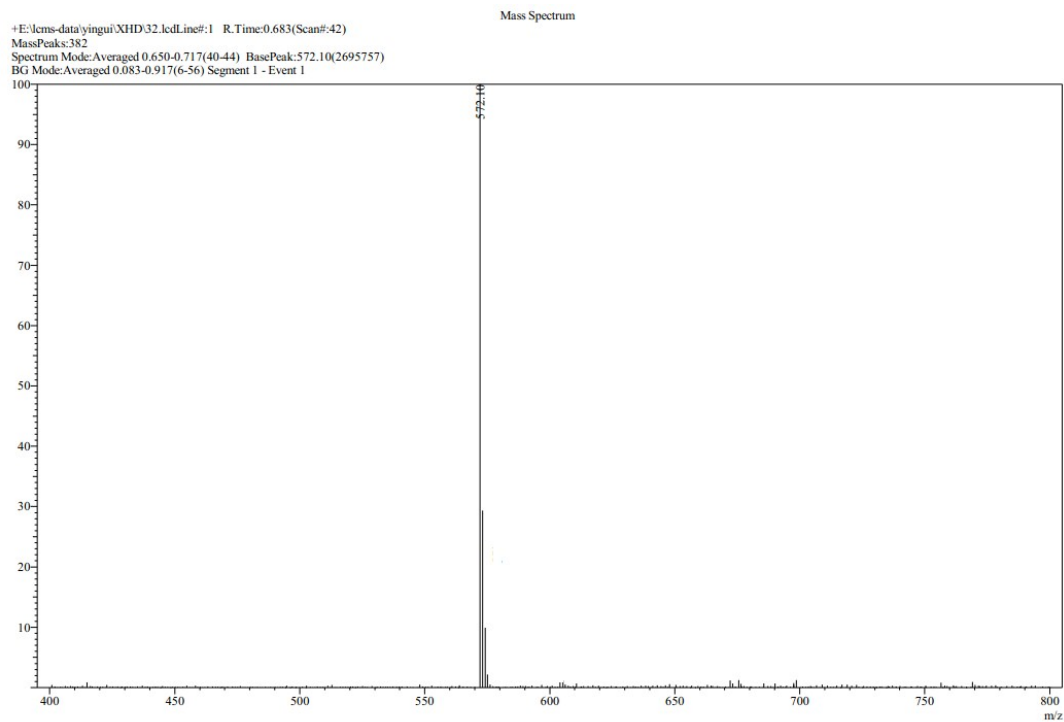

**Fig. S3** ESI-MS spectrum (positive mode) of product of PMN-TPP reacted with  $\text{ClO}^-$

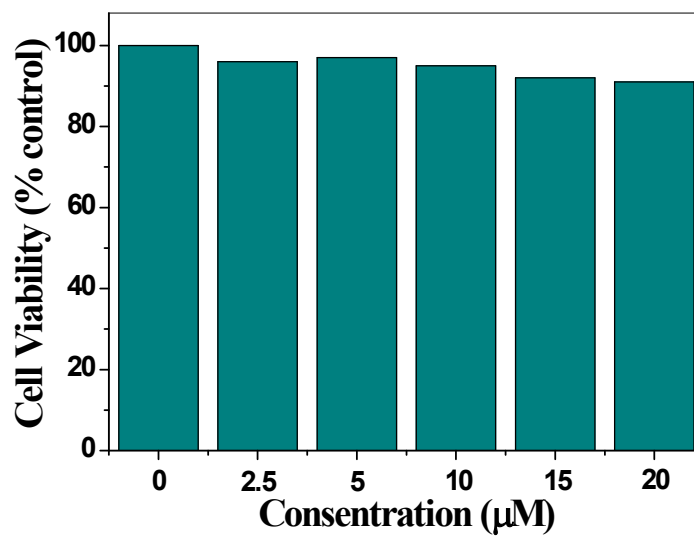

**Fig. S4** Cytotoxicity of PZ-Py at various concentrations (2.5  $\mu\text{M}$ , 5  $\mu\text{M}$ , 10  $\mu\text{M}$ , 15  $\mu\text{M}$  and 25  $\mu\text{M}$ ) in living RAW 264.7 cells for 12 h.

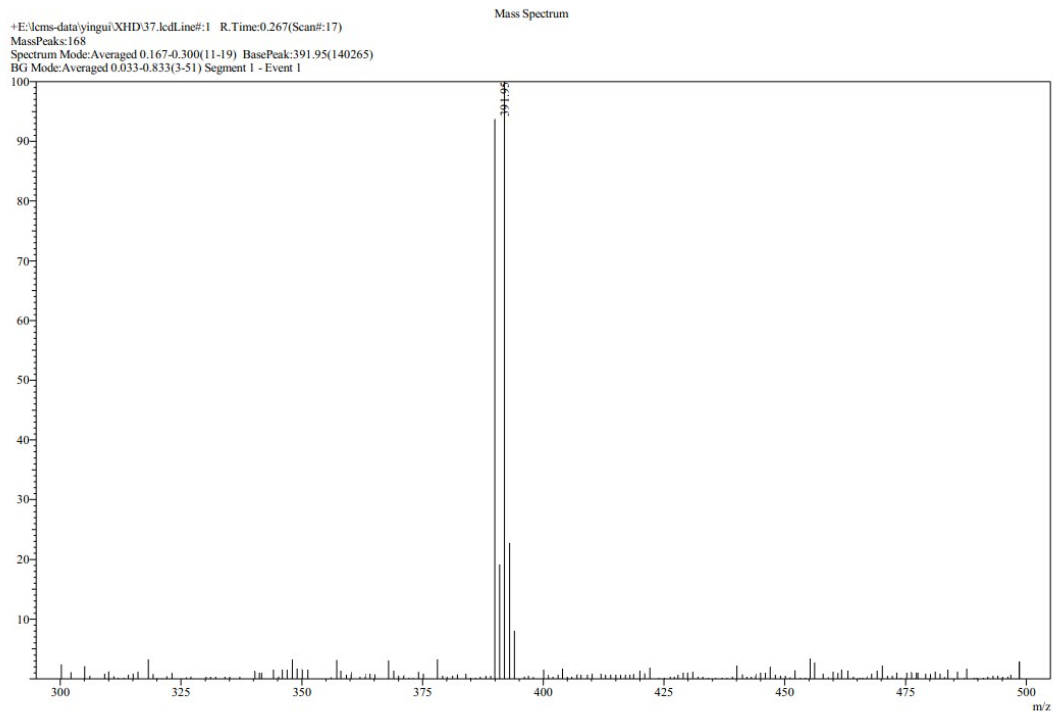

ESI-MS of compound 2

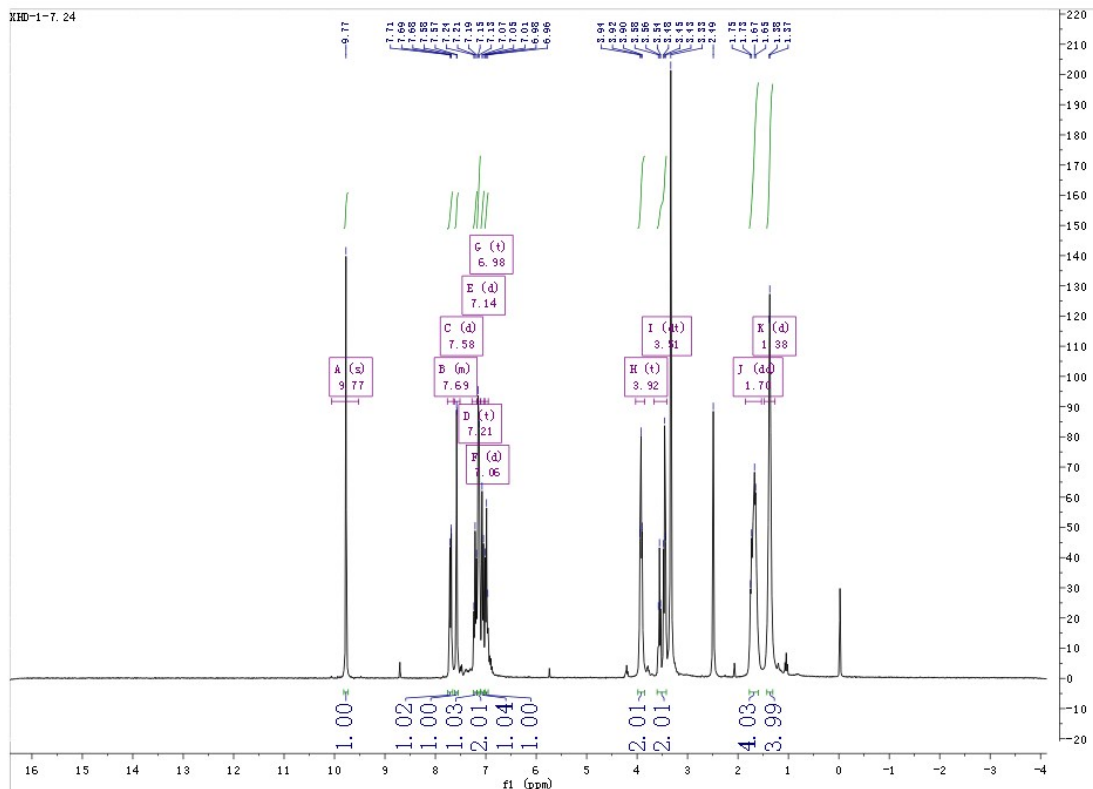

<sup>1</sup>H NMR spectrum of the compound 2

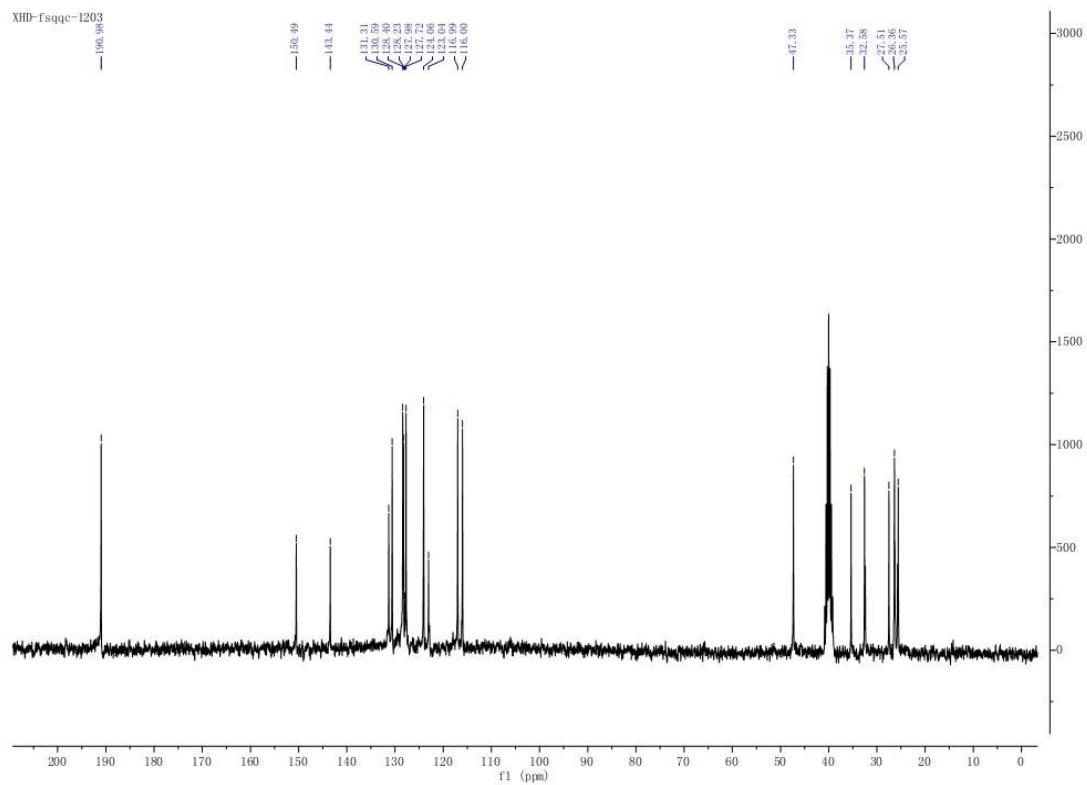

$^{13}\text{C}$  NMR spectrum of the compound 2

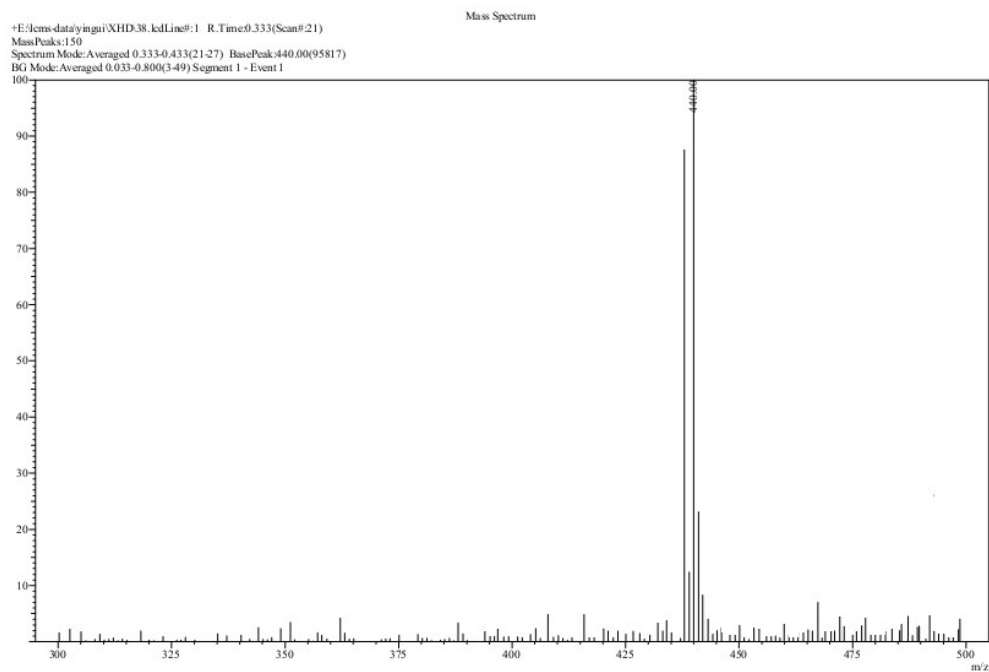

ESI-MS spectrum of compound 3

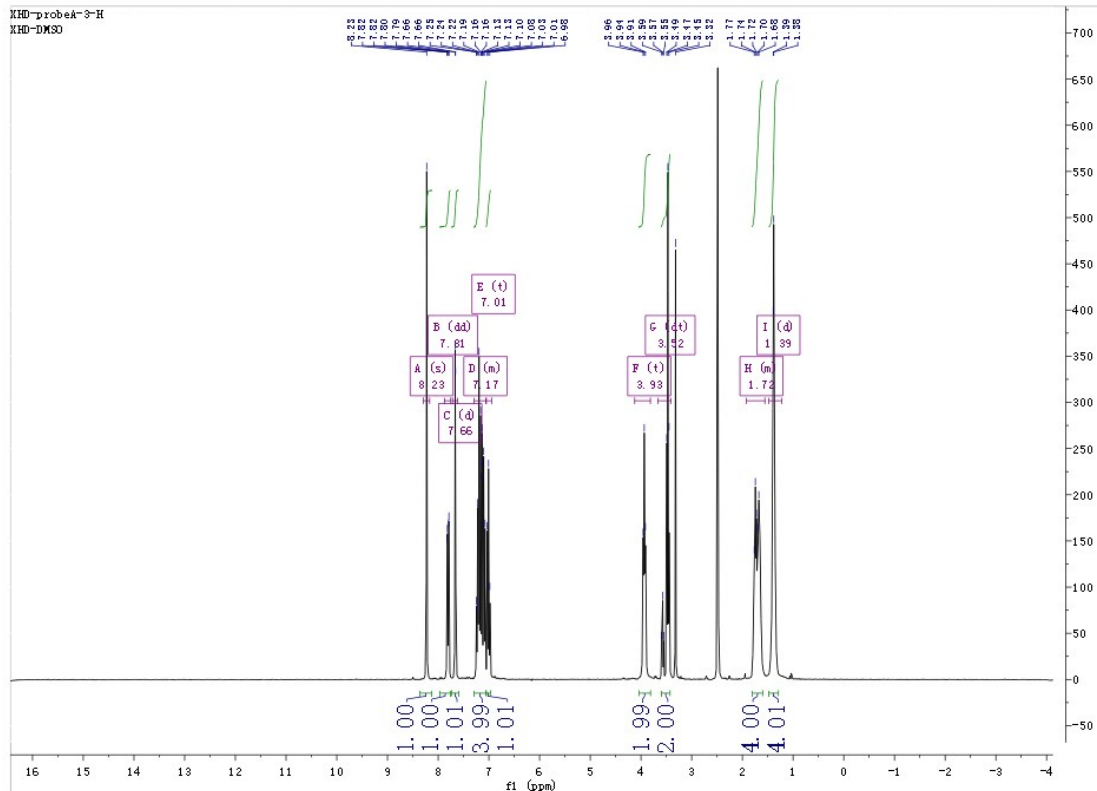

<sup>1</sup>H NMR spectrum of the compound 3

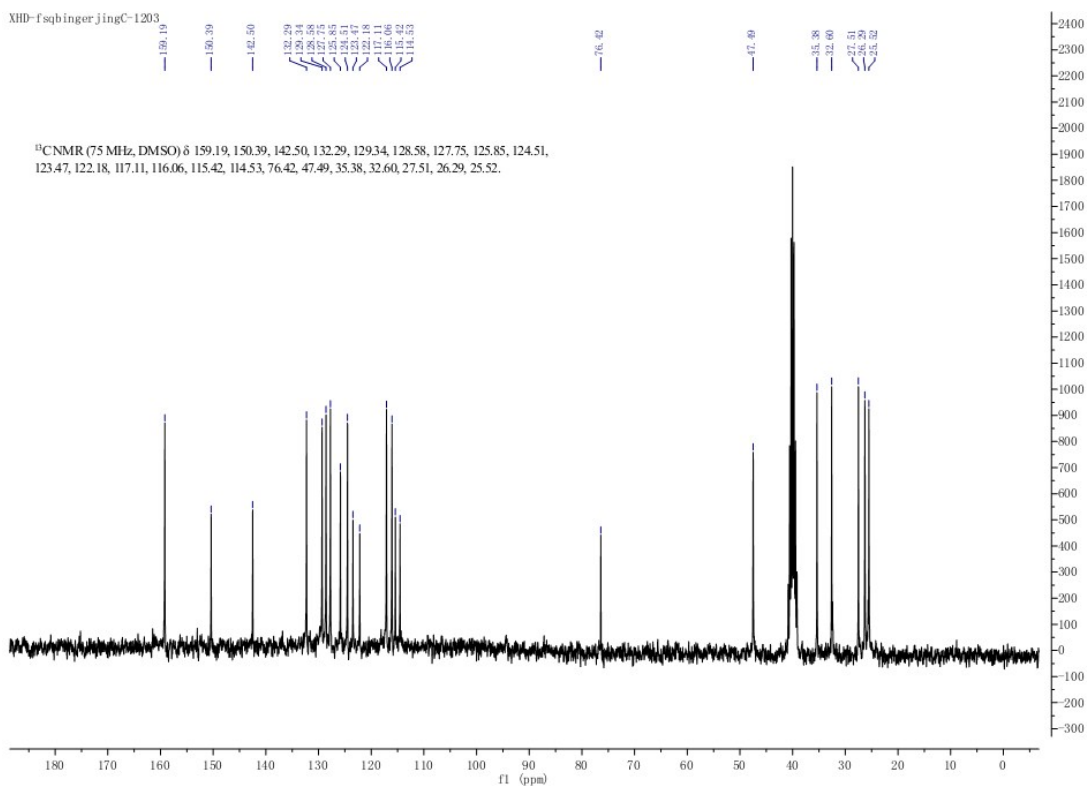

<sup>13</sup>C NMR spectrum of the compound 3

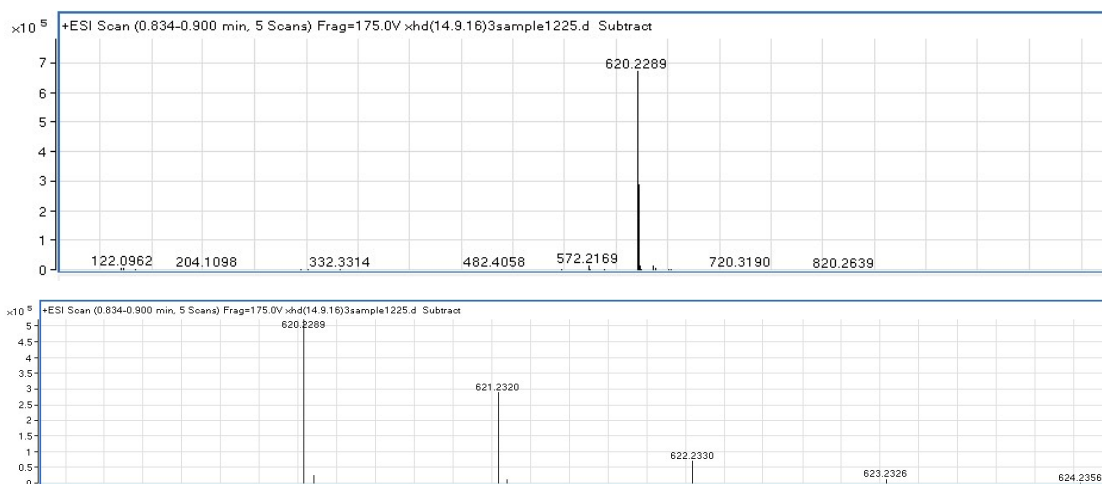

HR-MS spectrum of the probe PMN-TPP

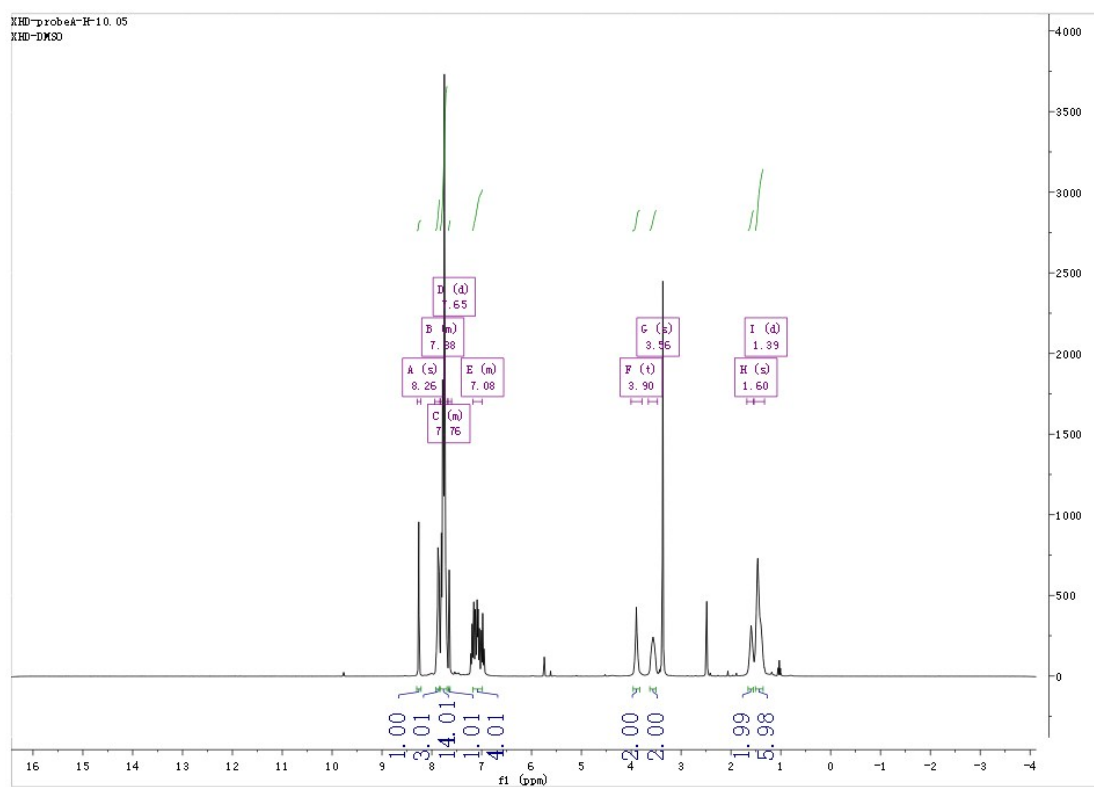

<sup>1</sup>H NMR of the probe

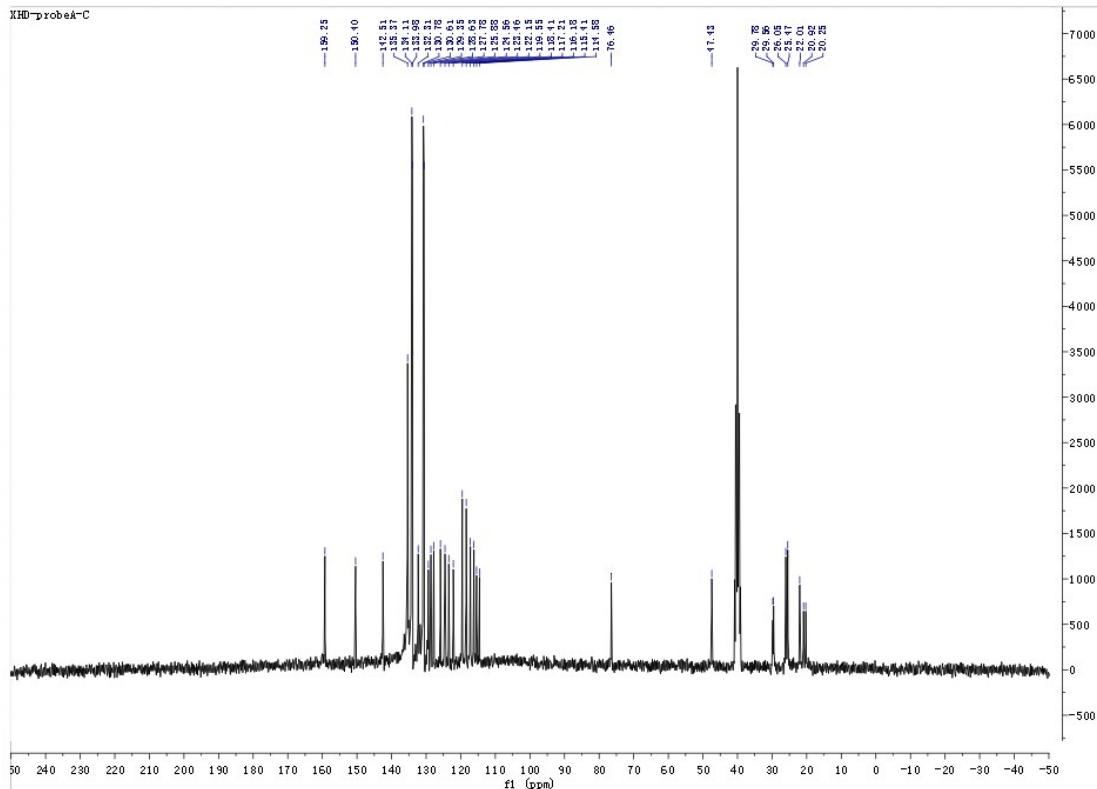

$^{13}\text{C}$  NMR of the probe
